# Supplementary material
Source: MDPI journal article supplement (https://www.mdpi.com/2313-0105/6/3/39)

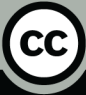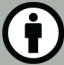

BY

Supplement: s1 [file s1]

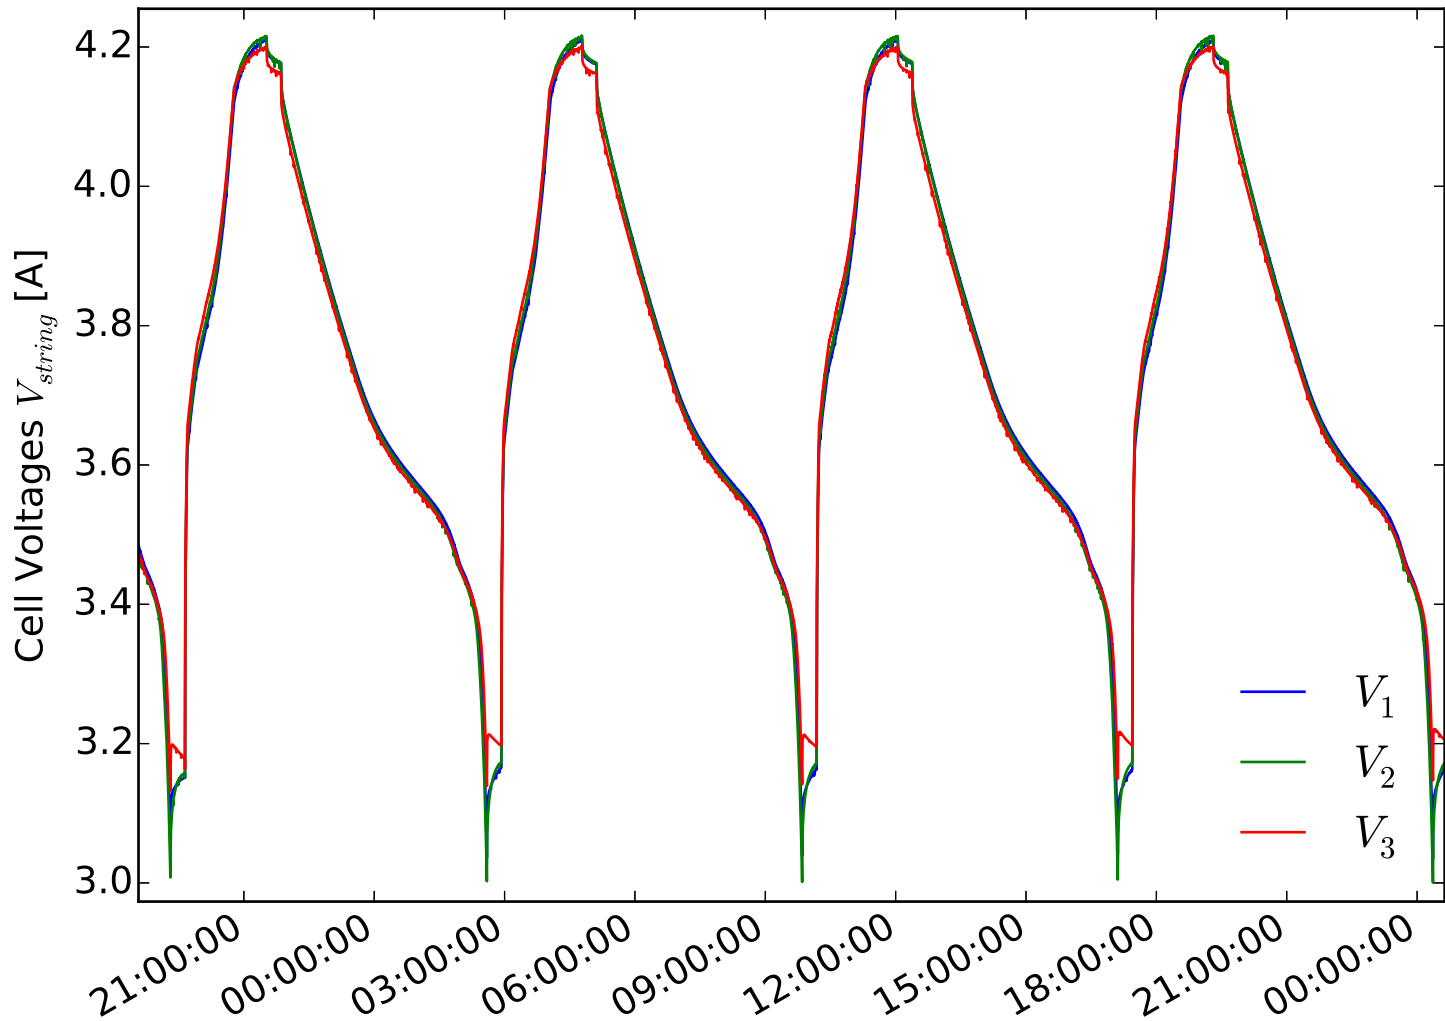

Supplement: s1 [file s1]

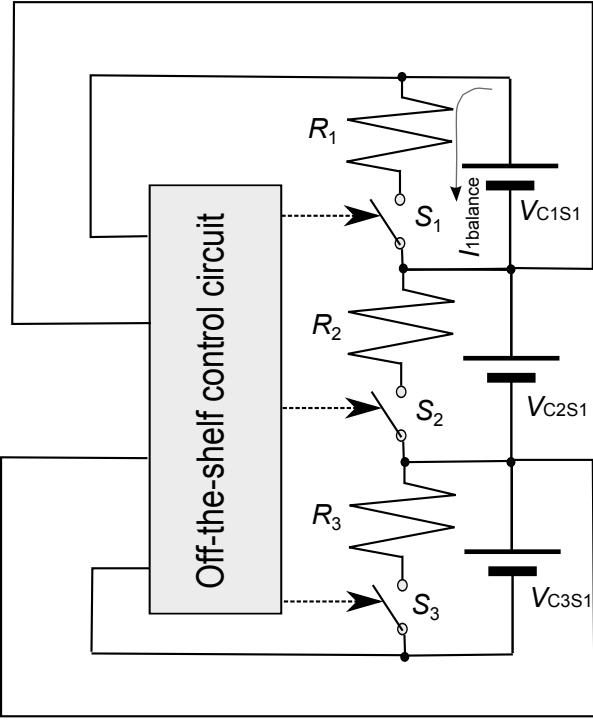

Supplement: s1 [file s1]

String currents  $I_{string}$  [A]

$I_1$   
 $I_2$   
 $I_3$

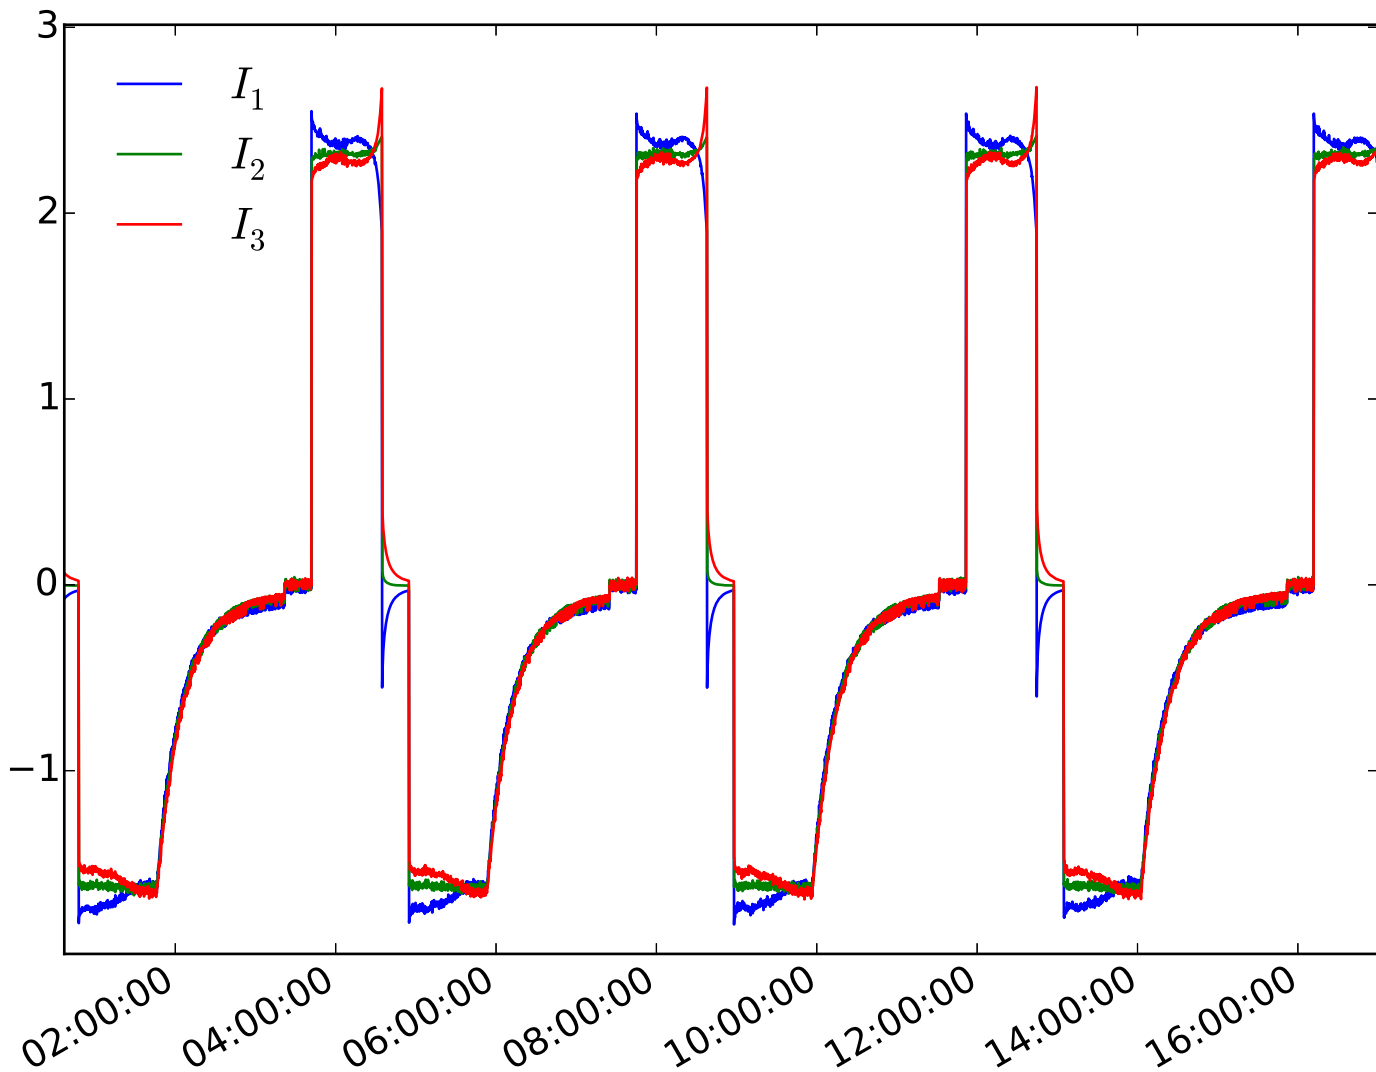

Supplement: s1 [file s1]

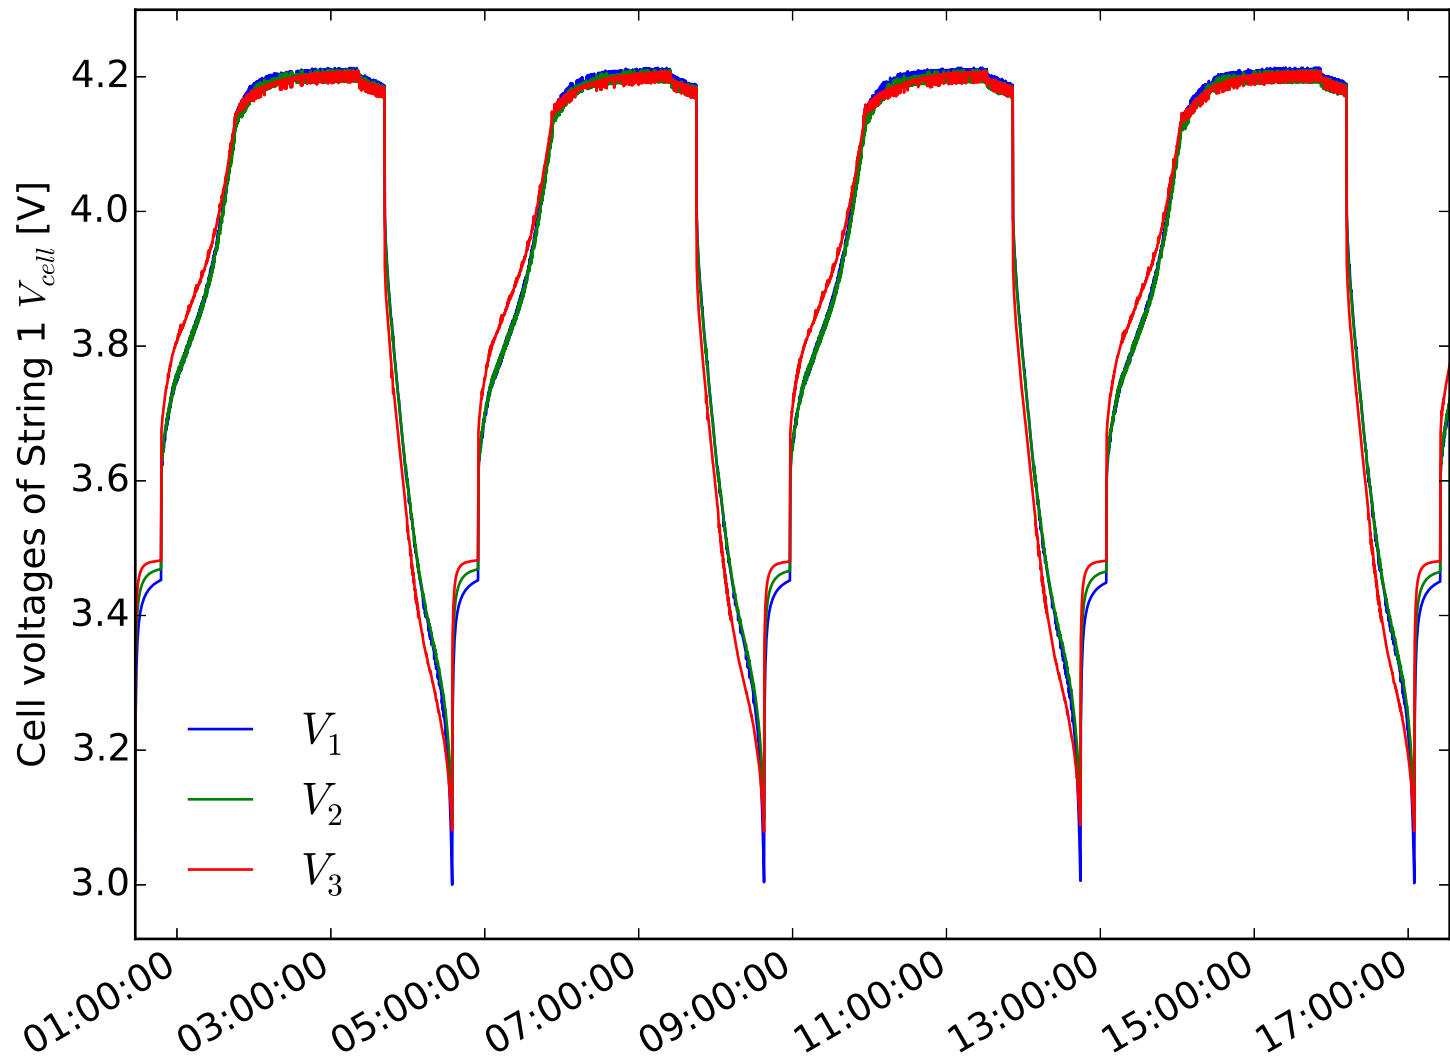

Supplement: s1 [file s1]

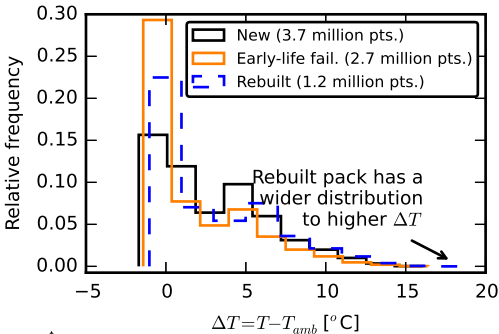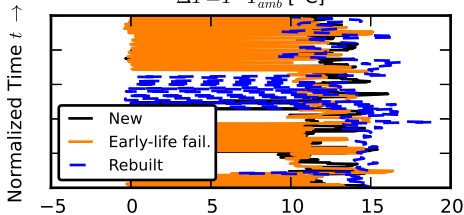

Supplement: s1 [file s1]

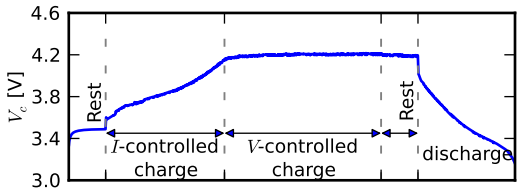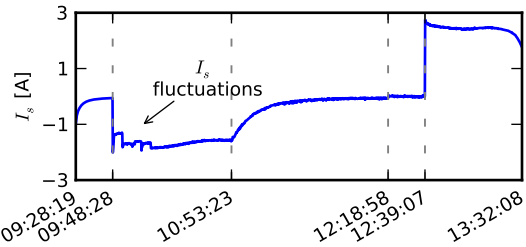

Supplement: s1 [file s1]

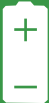

*batteries*

Supplement: s1 [file s1]

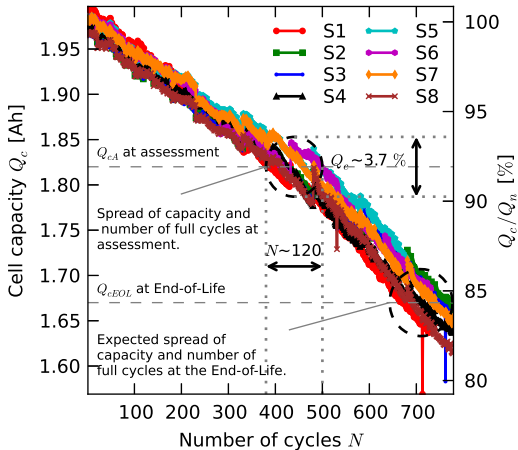

Supplement: s1 [file s1]

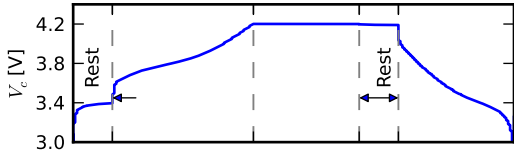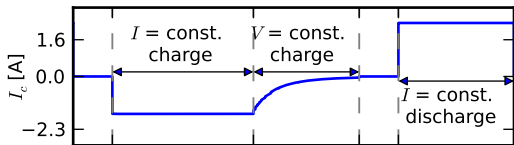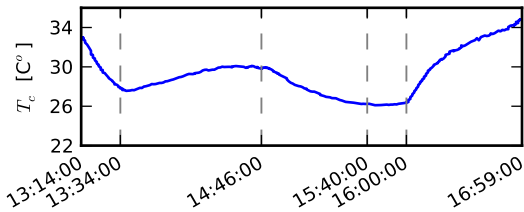

Supplement: s1 [file s1]

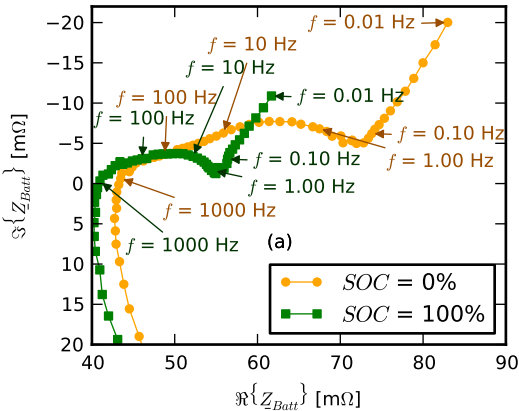

Supplement: s1 [file s1]

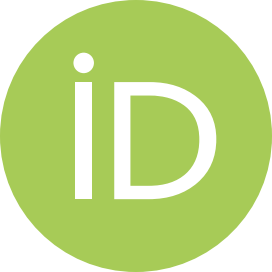

Supplement: s1 [file s1]

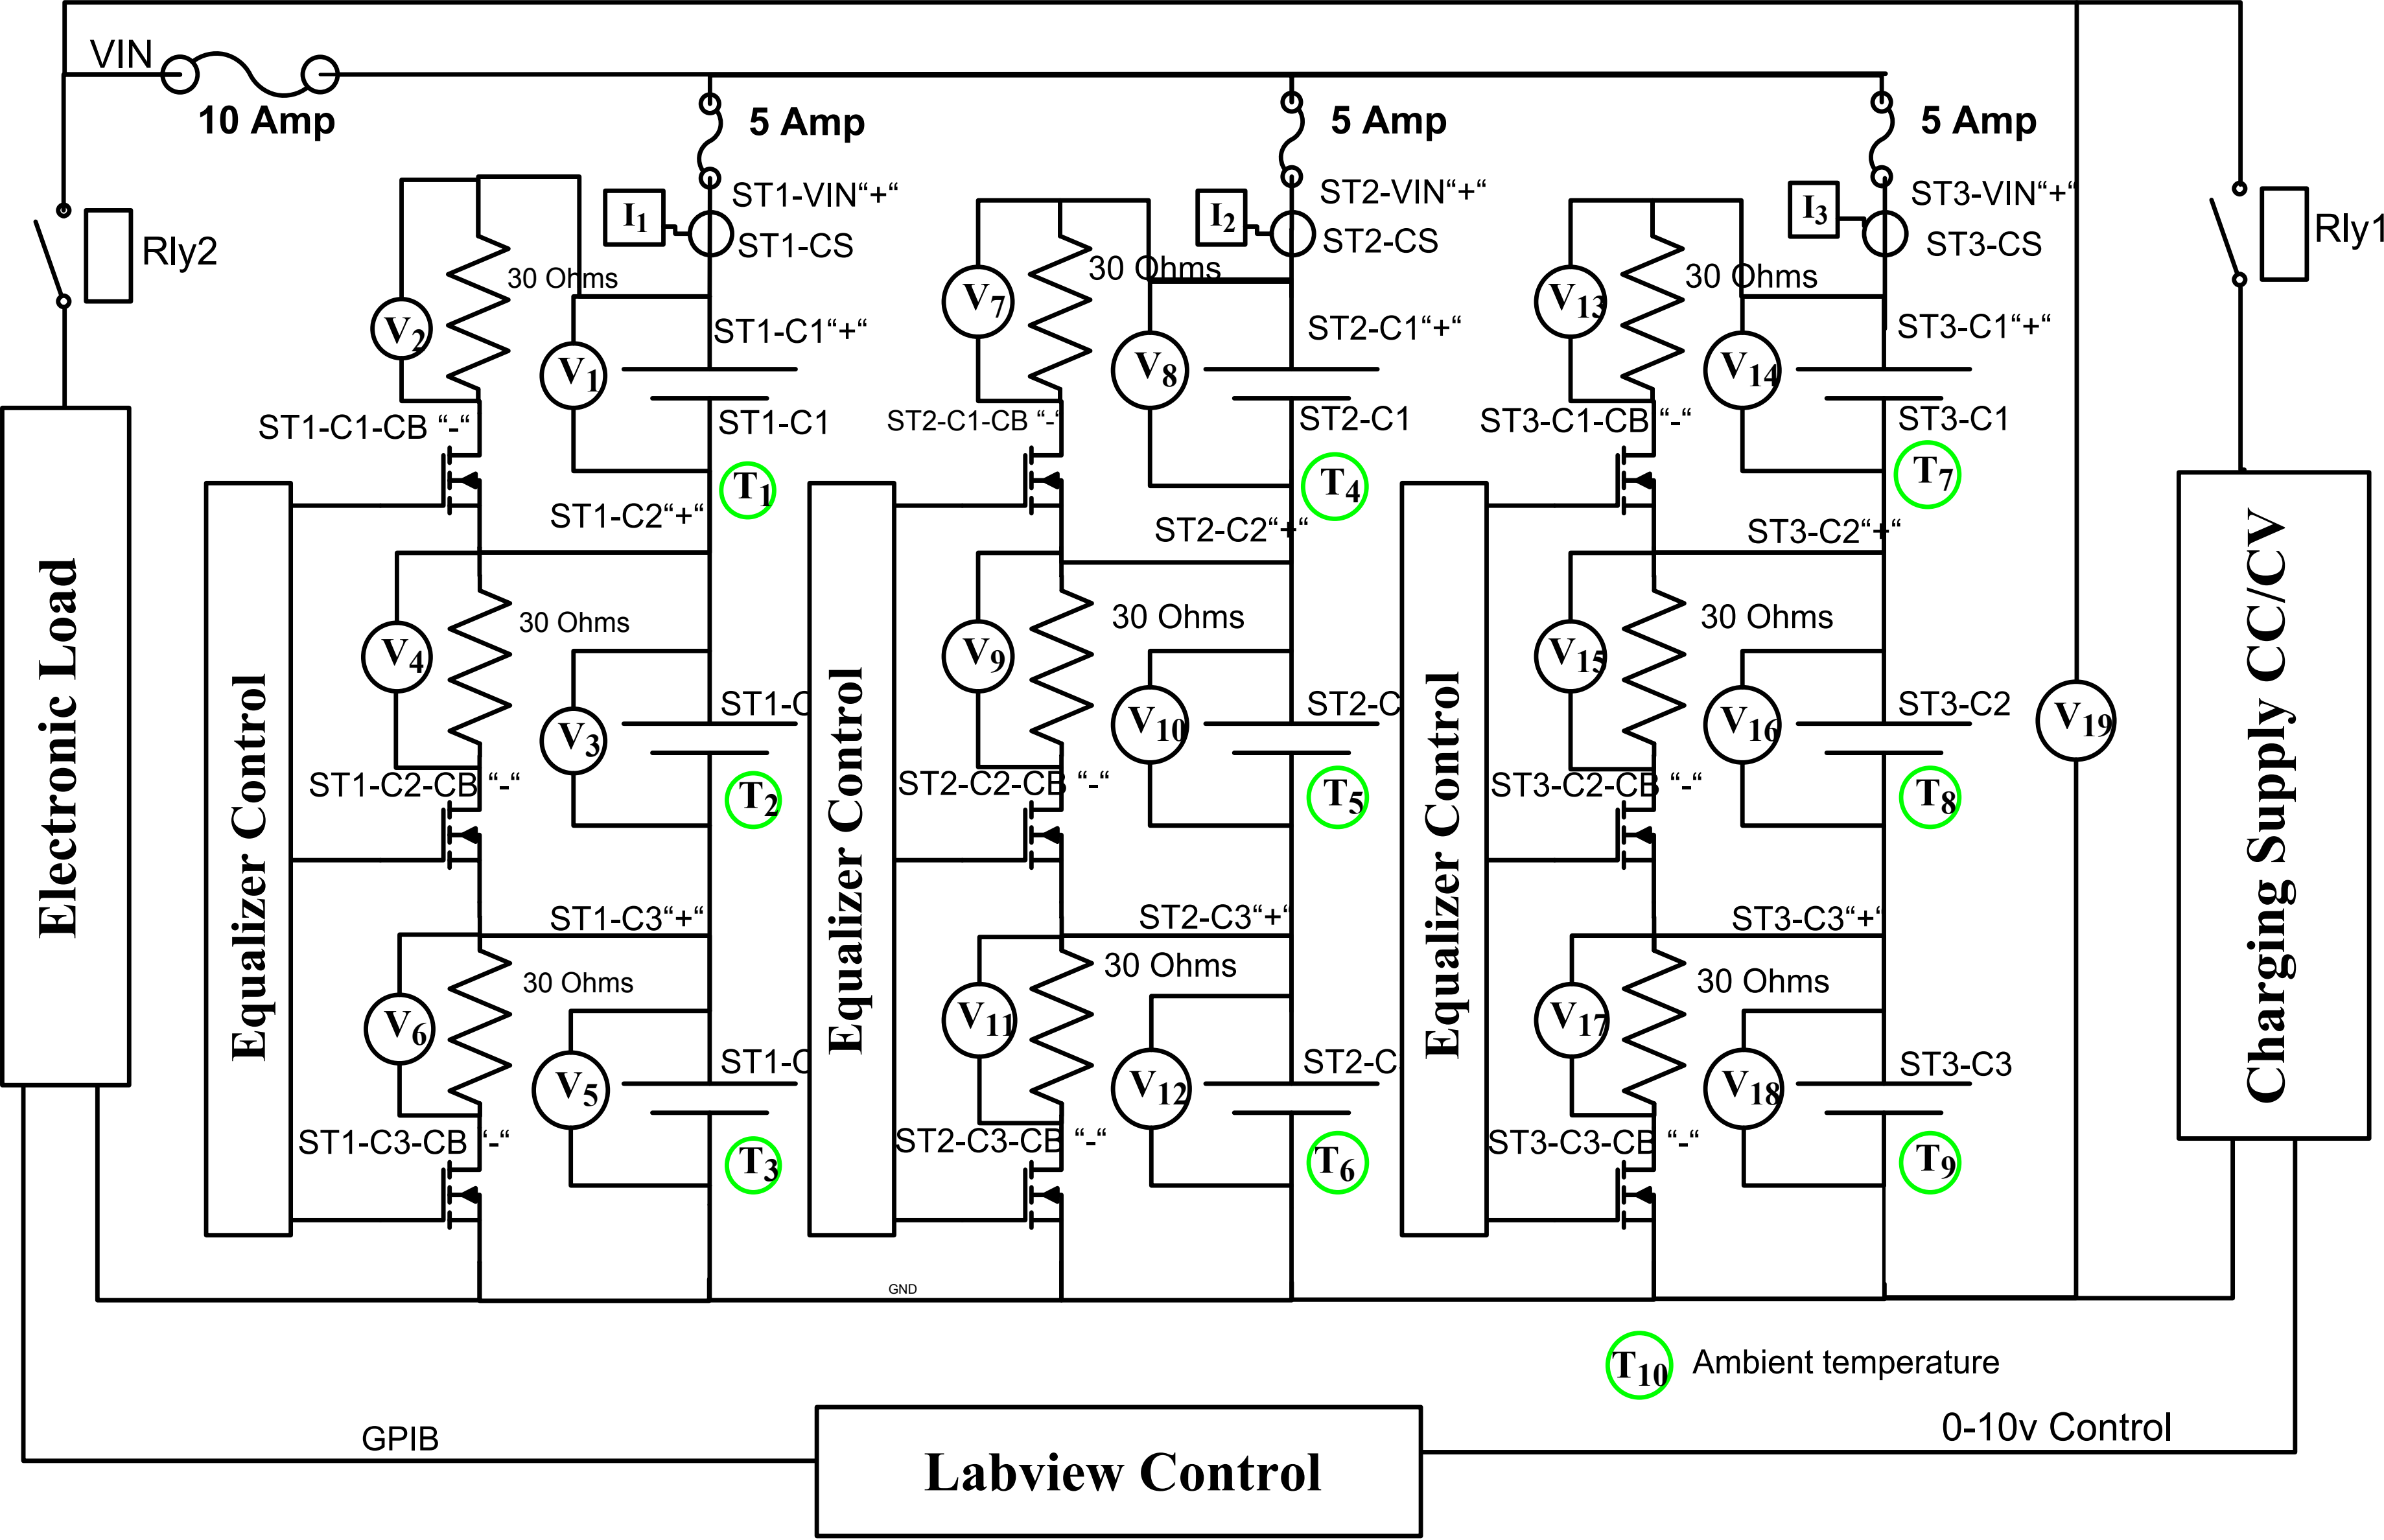

Supplement: s1 [file s1]

58 cells  $\mu = 44.26$ ,  $\sigma = 0.11$  (0.26 %)

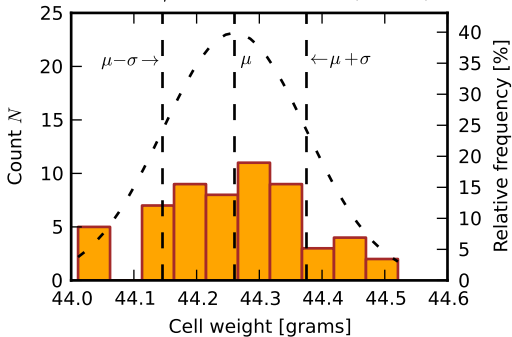

Supplement: s1 [file s1]

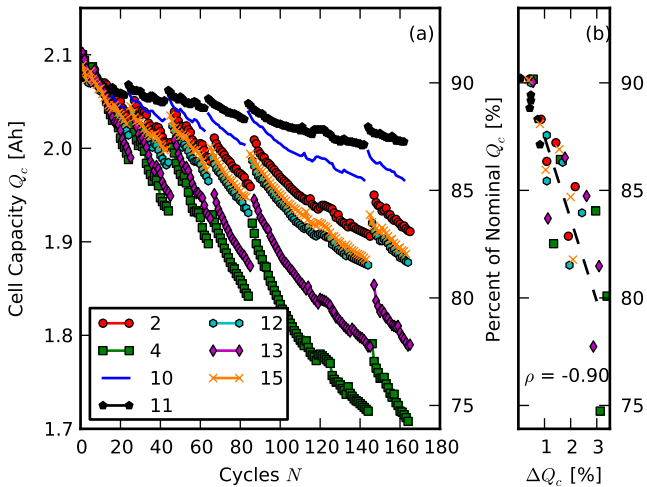

Supplement: s1 [file s1]

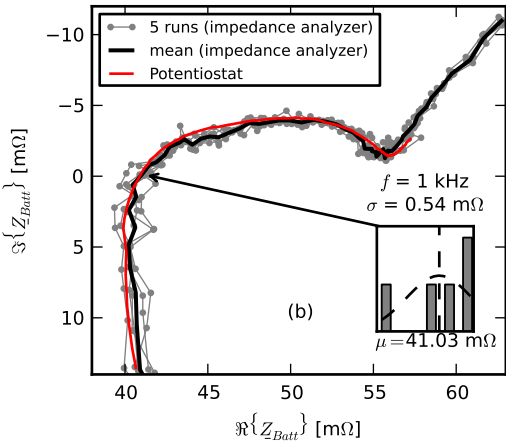

Supplement: s1 [file s1]
